# Supplementary material for: Cytotoxicity of fluorographene
Source: Royal Society of Chemistry journal article supplement (doi:10.1039/c5ra22663e), 2015-01-01
Supplement: c5ra22663e1.pdf [file c5ra22663e1.pdf]

## Supporting Information

### Cytotoxicity of fluorographene

Wei Zhe Teo<sup>a</sup>, Zdenek Sofer<sup>b</sup>, Filip Šembera<sup>c</sup>, Zbyněk Janoušek<sup>c</sup> and Martin Pumera<sup>\*a</sup>

<sup>a</sup>Division of Chemistry & Biological Chemistry, School of Physical and Mathematical Sciences, Nanyang Technological University, 21 Nanyang Link, Singapore 637371, Singapore. E-mail: pumera@ntu.edu.sg

<sup>b</sup>Institute of Chemical Technology, Department of Inorganic Chemistry, Technická 5, 166 28 Prague 6, Czech Republic

<sup>c</sup>Institute of Organic Chemistry and Biochemistry AS CR, v.v.i., Flemingovo nam. 2., 166 10 Prague 6, Czech Republic.

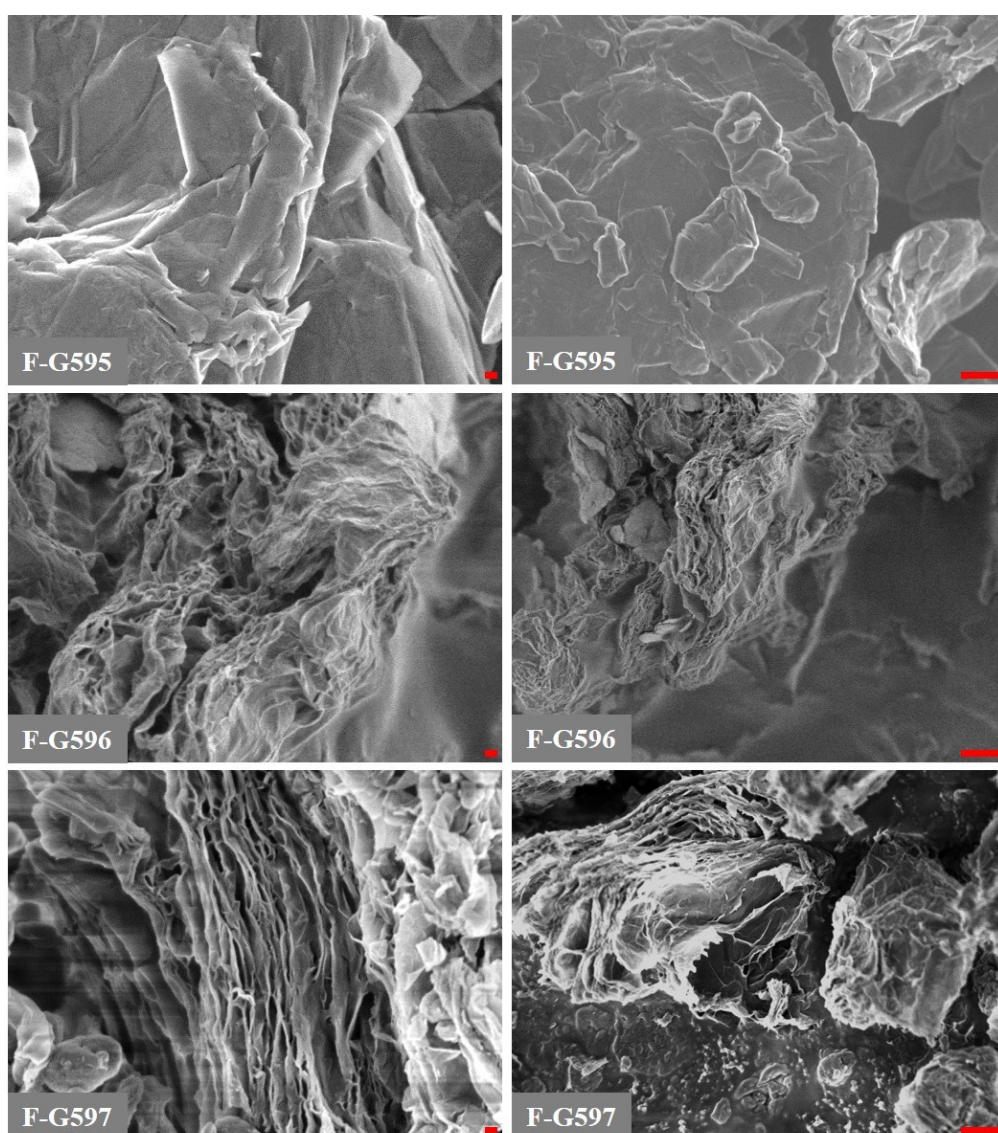

**Figure SI-1** SEM images of three different fluorinated graphene nanomaterials (F-G595, F-G596 and F-G597). Scale bar at the bottom right of each image represents 100 nm (left side) and 1 μm (right side) respectively.

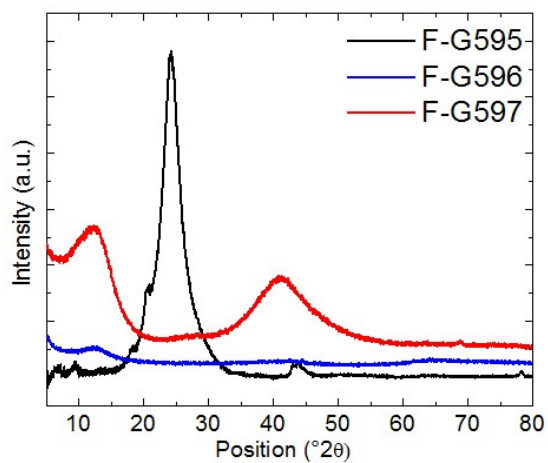

**Figure SI-2** The X-ray diffraction of three different fluorinated graphene nanomaterials (F-G595, F-G596 and F-G597).

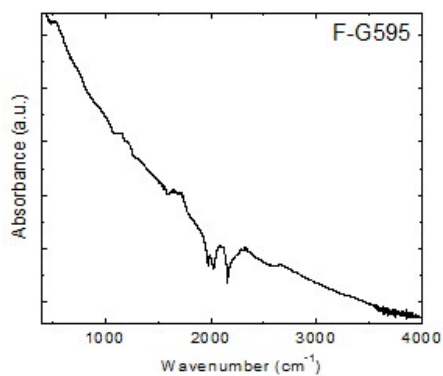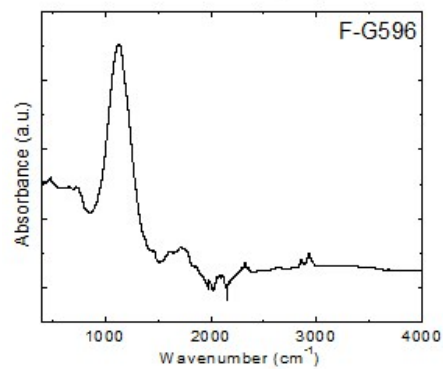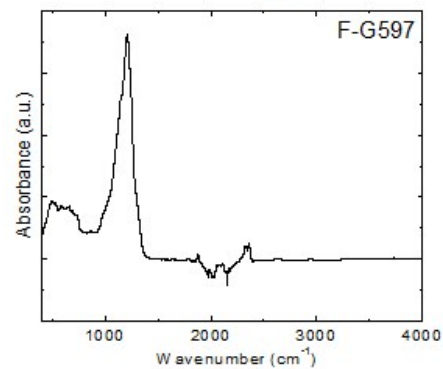

**Figure SI-3** The FT-IR spectra of three different fluorinated graphene nanomaterials (F-G595, F-G596 and F-G597).
